# Supplementary material
Source: PubMed Central journal article supplement (PMC7674976)
Supplement: mmc1.pdf [file mmc1.pdf]

## Airway Clearance Techniques in Bronchiectasis

### Analysis From the United States Bronchiectasis and Non-TB Mycobacteria Research Registry

*Ashwin Basavaraj, MD; Radmila Choate, PhD, MPH; Doreen Addrizzo-Harris, MD; Timothy R. Aksamit, MD; Alan Barker, MD; Charles L. Daley, MD; M. Leigh Anne Daniels, MD, MPH; Edward Eden, MD; Angela DiMango, MD; Kevin Fennelly, MD; David E. Griffith, MD; Margaret M. Johnson, MD; Michael R. Knowles, MD; Mark L. Metersky, MD; Peadar G. Noone, MD; Anne E. O'Donnell, MD; Kenneth N. Olivier, MD, MPH; Matthias A. Salathe, MD; Andreas Schmid, MD; Byron Thomashow, MD; Gregory Tino, MD; and Kevin L. Winthrop, MD, MPH*

CHEST 2020; 158(4):1376-1384

*Online supplements are not copyedited prior to posting and the author(s) take full responsibility for the accuracy of all data.*

**e-Table 1.** Results of the missing data analyses comparing characteristics of the participants included in and excluded from the multivariable multinomial regression analyses

|                                                    | Included in the multinomial regression analyses, n=456 | Excluded from the multinomial regression analyses* n=449 | p-value |
|----------------------------------------------------|--------------------------------------------------------|----------------------------------------------------------|---------|
| Age, mean (SD)                                     | 63 (14)                                                | 63 (15)                                                  | 0.833   |
| Female, n (%)                                      | 352 (77)                                               | 354 (79)                                                 | 0.467   |
| Caucasian, n (%)                                   | 417 (92)                                               | 406 (91)                                                 | 0.706   |
| NTM**, n (%)                                       | 119 (28)                                               | 135 (36)                                                 | 0.027   |
| Pre-bronchodilator FEV1 (L) at baseline, mean (SD) | 1.80 (0.72)                                            | 1.85 (0.72)                                              | 0.266   |
| Pre-bronchodilator FVC (L) at baseline, mean (SD)  | 2.67 (0.92)                                            | 2.72 (0.87)                                              | 0.446   |

SD=standard deviation; NTM=non-tuberculous mycobacteria; FEV<sub>1</sub>=forced expiratory volume in one second; L=liter; FVC=forced vital capacity; \*Incomplete/missing data on frequency of exacerbations at baseline or follow-up year or *Pseudomonas aeruginosa*; \*\*defined as history of NTM lung disease prior to enrollment, or ≥2 AFB positive sputum cultures, or ≥1 AFB bronchoalveolar lavage or transbronchial biopsy cultures.
